# Supplementary material for: Cross-Antigenicity between EV71 Sub-Genotypes: Implications for Vaccine Efficacy
Source: Viruses. 2021 Apr 21;13(5):720. doi: 10.3390/v13050720 (PMC8143144; doi:10.3390/v13050720)
Supplement: Supplementary file 1 [file viruses-13-00720-s001.zip › viruses-1177268-supplementary.pdf]

## Supplementary Materials: Cross-Antigenicity between EV71 Sub-Genotypes: Implications for Vaccine Efficacy

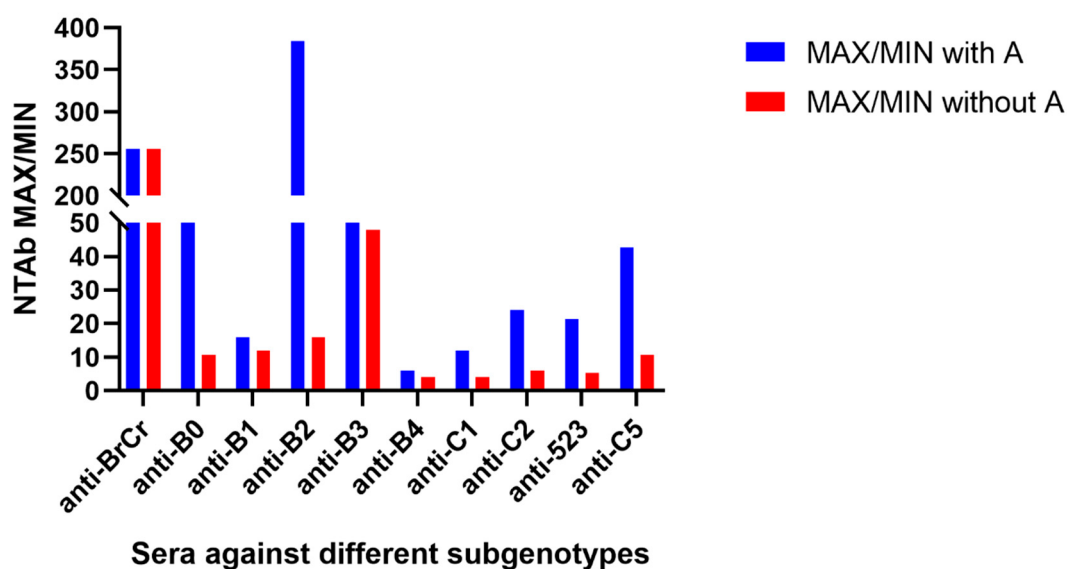

**Figure S1.** The MAX/MIN of 10 sera against viruses with and without A

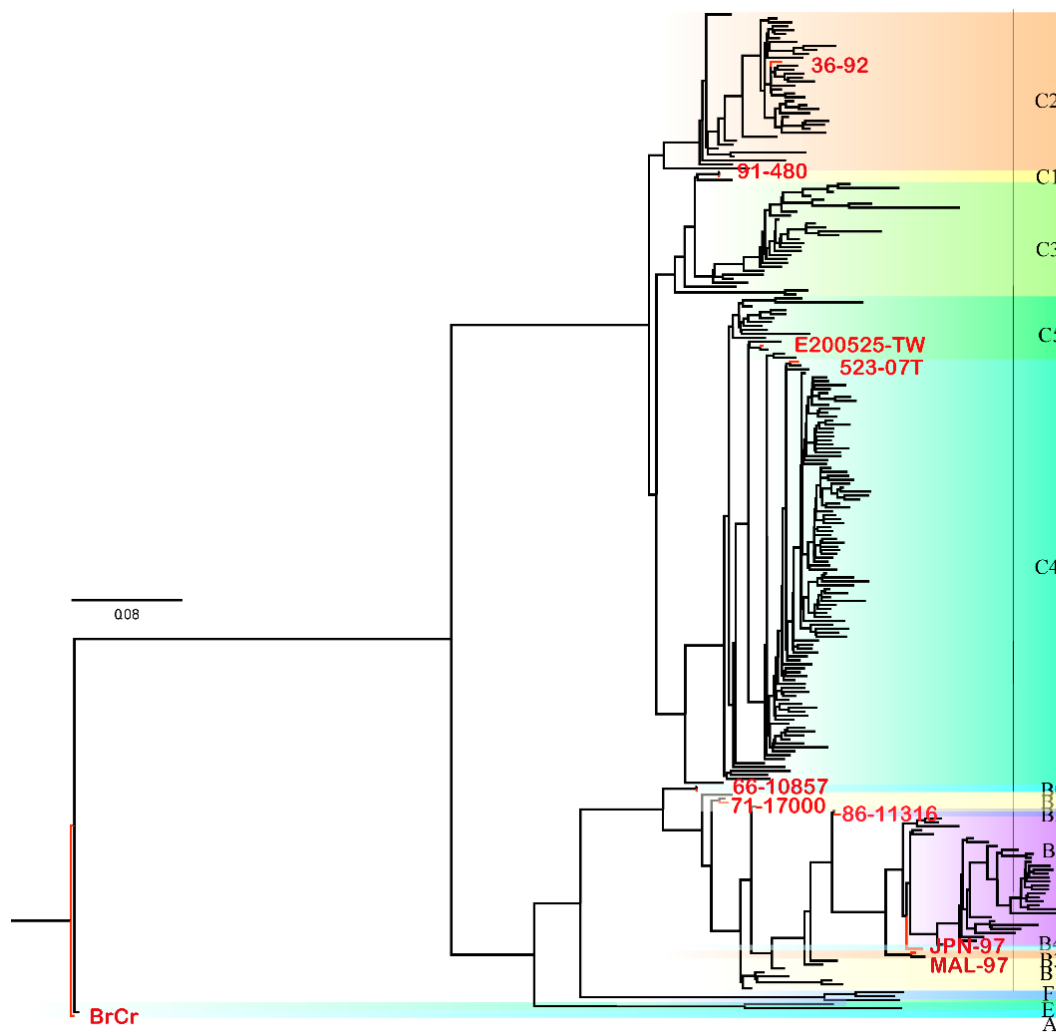

**Figure S2.** Phylogenetic tree of EV71 strains based on partial P1 coding sequences

[illegible][illegible][illegible][illegible][illegible][illegible]

68-10857-01-2586 1120 g a a g t a a a a a t t g c c a a a a g t a c a a c a g t t t t g g a a g g t a g g t t t c c g t t t g a g c a a g g g a a g g t t g t t g t g c a g t t t t c a g g a g c a a n n t t g g g a g a t g g t t t g a a c a t a a a t t g t t g g c a c g t t t g g a g t t a c a a c c a t t t g g a g t t t t g g a 1316  
 71-170009-01-2586 1120 g a a g t t a a a c g t t a c a a a t g t a c a a c a g t t t g g a a g g t a g g t t t c c g t t t t t c a a g a g g g a a g g t t a t t g t c c g t t t t t c a g g a g c a t c a a g a g g a g c c c g t t g g t t a a a c c a t t t g g c a c g t t t t g g a t a c a a c c a t t g t t g a a g a t a c t g g a 1316  
 MAL-93-05-2586 1120 g a a g t t a a a c g t t a c a a a t g t a c a a c a g t t t g g a a g g t a g g t t t c c g t t t t t c a a g a g g g a a g g t t a t t g t c c g t t t t t c a g g a g c a t c a a g a g g a g c c c g t t g g t t a a a c c a t t t g g c a c g t t t t g g a t a c a a c c a t t g t t g a a g a t a c t g g a 1316  
 JMW93-04-2586 1120 g a a g t t a a a c g t t a c a a a t g t a c a a c a g t t t g g a a g g t a g g t t t c c g t t t t t c a a g a g g g a a g g t t a t t g t c c g t t t t t c a g g a g c a t c a a g a g g a g c c c g t t g g t t a a a c c a t t t g g c a c g t t t t g g a t a c a a c c a t t g t t g a a g a t a c t g g a 1316  
 49-0075-01-2586 1120 g a a g t a a a a t t a c c a c a g t a c a a c a g t t a t t g g a a g g t a g g t t t c c g t t t t t c a a g a a g c a a g g g t t a t t g t c a g t t t t t c a g g a c c a t t g g g a a t t g a c c a t t a c c t t t t t g g c a c g t t t t g g g t t a c a a c c a t t g t t g a a g a t a c t g g a 1316  
 50-0075-01-2586 1120 g a a g t a a a a t t a c c a c a g t a c a a c a g t t a t t g g a a g g t a g g t t t c c g t t t t t c a a g a a g c a a g g g t t a t t g t c a g t t t t t c a g g a c c a t t g g g a a t t g a c c a t t a c c t t t t t g g c a c g t t t t t g g g t t a c a a c c a t t g t t g a a g a t a c t g g a 1316  
 E23575-01-2586 1120 g a a g t a a a a t t a c c a c a g t a c a a c a g t t a t t g g a a g g t a g g t t t c c g t t t t t c a a g a a g c a a g g g t t a t t g t c a g t t t t t c a g g a c c a t t g g g a a t t g a c c a t t a c c t t t t t g g c a c g t t t t t g g g t t a c a a c c a t t g t t g a a g a t a c t g g a 1316  
 50-0075-01-2586 1120 g a a g t a a a a t t a c c a c a g t a c a a c a g t t a t t g g a a g g t a g g t t t c c g t t t t t c a a g a a g c a a g g g t t a t t g t c a g t t t t t c a g g a c c a t t g g g a a t t g a c c a t t a c c t t t t t g g c a c g t t t t t g g g t t a c a a c c a t t g t t g a a g a t a c t g g a 1316

[illegible][illegible][illegible]

|                   |      |                                                                                                                                                                                             |      |
|-------------------|------|---------------------------------------------------------------------------------------------------------------------------------------------------------------------------------------------|------|
| 61-0087-1980      | 1001 | tatgtatgacacgcctgtgttttctaacccaattacacggcgtgaacacccccctttgagttttcttcagacagagaggtttatgtggggatgagatcttctcttcgaagggccccacacatgaaggggtttgcaaaatgggacatgggacataaagcgtttatggcagatgacgacaaaggtggac | 2000 |
| 66-10087-1980     | 1001 | catgattgacacgcctgtgtttctaacccaattacacggcgtgaacacccccctttgagttttcttcagacagagaggtttatgtggggatgagatcttctcttcgaagggccccacacatgaaggggtttgcaaaatgggacatgggacataaagcgtttatggcagatgacgacaaaggtggac  | 2000 |
| 71-170009-1980    | 1001 | tatgtatgacacgcctgtgtttctaacccaattacacggcgtgaacacccccctttgagttttcttcagacagagaggtttatgtggggatgagatcttctcttcgaagggccccacacatgaaggggtttgcaaaatgggacatgggacataaagcgtttatggcagatgacgacaaaggtggac  | 2000 |
| 71-170009-1980    | 1001 | tatgtatgacacgcctgtgtttctaacccaattacacggcgtgaacacccccctttgagttttcttcagacagagaggtttatgtggggatgagatcttctcttcgaagggccccacacatgaaggggtttgcaaaatgggacatgggacataaagcgtttatggcagatgacgacaaaggtggac  | 2000 |
| MAU-97-031-1980   | 1001 | tatgtatgacacgcctgtgtttctaacccaattacacggcgtgaacacccccctttgagttttcttcagacagagaggtttatgtggggatgagatcttctcttcgaagggccccacacatgaaggggtttgcaaaatgggacatgggacataaagcgtttatggcagatgacgacaaaggtggac  | 2000 |
| JMW-97-01-1984    | 1001 | tatgtatgacacgcctgtgtttctaacccaattacacggcgtgaacacccccctttgagttttcttcagacagagaggtttatgtggggatgagatcttctcttcgaagggccccacacatgaaggggtttgcaaaatgggacatgggacataaagcgtttatggcagatgacgacaaaggtggac  | 2000 |
| 97-0301-1980      | 1001 | tatgtatgacacgcctgtgtttctaacccaattacacggcgtgaacacccccctttgagttttcttcagacagagaggtttatgtggggatgagatcttctcttcgaagggccccacacatgaaggggtttgcaaaatgggacatgggacataaagcgtttatggcagatgacgacaaaggtggac  | 2000 |
| 93-0523-1980      | 1001 | tatgtatgacacgcctgtgtttctaacccaattacacggcgtgaacacccccctttgagttttcttcagacagagaggtttatgtggggatgagatcttctcttcgaagggccccacacatgaaggggtttgcaaaatgggacatgggacataaagcgtttatggcagatgacgacaaaggtggac  | 2000 |
| 523075-1980       | 1001 | catgattgacacgcctgtgtttctaacccaattacacggcgtgaacacccccctttgagttttcttcagacagagaggtttatgtggggatgagatcttctcttcgaagggccccacacatgaaggggtttgcaaaatgggacatgggacataaagcgtttatggcagatgacgacaaaggtggac  | 2000 |
| 523075-700C1-1980 | 1001 | catgattgacacgcctgtgtttctaacccaattacacggcgtgaacacccccctttgagttttcttcagacagagaggtttatgtggggatgagatcttctcttcgaagggccccacacatgaaggggtttgcaaaatgggacatgggacataaagcgtttatggcagatgacgacaaaggtggac  | 2000 |

[illegible][illegible]

|                     |      |                                                                                                                                                                                                                                                           |      |
|---------------------|------|-----------------------------------------------------------------------------------------------------------------------------------------------------------------------------------------------------------------------------------------------------------|------|
| 601-16875801-17080  | 2440 | a a t t a a t t a a g g a a g t t a g g g t g t g g a a t t g g g g g a t g c a a c a a t t a t t g t t a a g a t c a a c c a a a a t t a t g t t g g t a t t c a t t a a a a a a t t g g t t a c a g c g a a g g g a a t t c a t t a g t t e t t         | 2086 |
| 66-108157801-17080  | 2440 | a a t a t a t a t t a g g a a g a t t c g g g a t t a g a t t a c c c t g t g c a a c c c a a a t t a c t t t t a a g g a a t c a a c a a a t t a t g t t g g a a c t c a a g a a a a a a t t g g a a c t t g c a t t c a t t a a t t t                   | 2086 |
| 7-110009151-17080   | 2440 | a a t a t a t a t t a g g a a t t a g g c a t t c g g g a t t a t g a a c t c t g c a a t t a t g t t a a c c a a a t t a t t t t a a g g a a t c a a a a a t t a g c t t g g a a c t c a a t t a a a a a a a a a c g t t a g t t c a t t a a t t t       | 2086 |
| 7A-974831-17080     | 2440 | a a t a t a t a t t a g g a a t t a g g c a t t c g g g a t t a t g a a c t c t g c a a t t a t g t t a a c c a a a t t a t t t t a a g g a a t c a a a a a a t t a g c t t g g a a c t c a a t t a a a a a a a a a c g t t a g t t c a t t a a t t t     | 2086 |
| 10-974831-17080     | 2440 | a a t a t a t a t t a g g a a t t a g g c a t t c g g g a t t a t g a a c t c t g c a a t t a t g t t a a c c a a a t t a t t t t a a g g a a t c a a a a a a t t a g c t t g g a a c t c a a t t a a a a a a a a a c g t t a g t t c a t t a a t t t     | 2086 |
| JPM-97481-17080     | 2440 | a a t a t a t a t t a g g a a t t a g g c a t t c g g g a t t a t g a a c t c t g c a a t t a t g t t a a c c a a a a a t t a t t t t a a g g a a t c a a a a a a t t a g c t t g g a a c t c a a t t a a a a a a a a a c g t t a g t t c a t t a a t t t | 2086 |
| 19-4805161-17080    | 2440 | a a t t a t a t t a g g a t t a g g c a t t c g g g a t t a t g a a c t c t g c a a t t a t g t t a a c c a a a a a t t a t t t t a a g g a t a a c c a a t t a t t a a a a a a a a a c g t t a g t t c a a g a t c a a c a t t t                         | 2086 |
| 25-974831-17080     | 2440 | a a t a t a t a t t a g g a a t t a g g c a t t c g g g a t t a t g a a c t c t g c a a t t a t g t t a a c c a a a a t t a t t t t a a g g a a t c a a a a a a t t a g c t t g g a a c t c a a t t a a a a a a a a a c g t t a g t t c a t t a a t t t   | 2086 |
| 53-974774C-17080    | 2440 | a a t t a t a t t a g g a a t t a g g c a t t c g g g a t t a t g a a c t c t g c a a t t a t g t t a a c c a a a a t t a t t t t a a g g a a t c a a a a a a t t a g c t t g g a a c t c a a t t a a a a a a a a a c g t t a g t t c a t t a a t t t     | 2086 |
| E200525-TWC15-17080 | 2440 | a a t t a t a t t a g g a a t t a g g c a t t c g g g a t t a t g a a c t c t g c a a t t a t g t t a a c c a a a a a t t a t t t t a a g g a a t c a a a a a a t t a g c t t g g a a c t c a a t t a a a a a a a a a c g t t a g t t c a t t a a t t t   | 2086 |

**Figure S3.** The P1 sequences of ten viruses.**Table S1.** Amino acid sequences at key positions in EV71 strains from different sub-genotypes.

| Strain | VP1 |    |     |     |     |          |          | VP2      | VP4 |
|--------|-----|----|-----|-----|-----|----------|----------|----------|-----|
|        | 43  | 98 | 145 | 148 | 164 | 167      | 172      | 143      | 7   |
| A      | K   | K  | R   | P   | D   | <i>D</i> | <i>P</i> | <i>N</i> | T   |
| B0     | K   | E  | Q   | P   | D   | E        | Q        | D        | T   |
| B1     | E   | N  | E   | R   | D   | E        | Q        | D        | T   |
| B2     | E   | E  | Q   | P   | E   | E        | Q        | D        | T   |
| B3     | E   | E  | G   | P   | E   | E        | Q        | D        | T   |
| B4     | E   | E  | E   | P   | E   | E        | Q        | D        | T   |
| C1     | K   | E  | Q   | P   | D   | E        | Q        | D        | T   |
| C2     | K   | E  | Q   | P   | D   | E        | Q        | D        | A   |
| C4     | K   | E  | Q   | P   | D   | E        | Q        | D        | T   |
| C5     | K   | E  | Q   | P   | D   | E        | Q        | D        | T   |
